# 1 Aboveground biomass increments over 26 years (1993–2019) 2 in an old-growth cool-temperate forest in northern Japan

3 Mahoko Noguchi<sup>1\*</sup>, Kazuhiko Hoshizaki<sup>2</sup>, Michinari Matsushita<sup>3</sup>,  
4 Daiki Sugiura<sup>2</sup>, Tsutomu Yagihashi<sup>4</sup>, Tomoyuki Saitoh<sup>1</sup>, Tomohiro Itabashi<sup>2</sup>,  
5 Ohta Kazuhide<sup>2</sup>, Mitsue Shibata<sup>4</sup>, Daisuke Hoshino<sup>4</sup>, Takashi Masaki<sup>4</sup>,  
6 Katsuhiro Osumi<sup>5</sup>, Kazunori Takahashi<sup>6</sup>, Wajirou Suzuki<sup>7</sup>

7 <sup>1</sup> *Tohoku Research Center, Forestry and Forest Products Research Institute, Morioka, 020-0123, Japan*

8 <sup>2</sup> *Department of Biological Environment, Akita Prefectural University, Akita, 010-0195, Japan*

9 <sup>3</sup> *Forest Tree Breeding Center, Forestry and Forest Products Research Institute, Hitachi, 319-1301, Japan*

10 <sup>4</sup> *Forestry and Forest Products Research Institute, Tsukuba, 305-8687, Japan*

11 <sup>5</sup> *Field Science Center, Faculty of Agriculture, Tottori University (retired), Tottori, 680-8553, Japan*

12 <sup>6</sup> *Kansai Research Center, Forestry and Forest Products Research Institute, Kyoto, 612-0855, Japan*

13 <sup>7</sup> *Forestry and Forest Products Research Institute (retired), Tsukuba, 305-8687, Japan*

14 \* Corresponding author. E-mail: mahoko@ffpri.affrc.go.jp

15

## 16 Abstract

17 Assessing long-term changes in biomass of old-growth forests is critical in evaluating  
18 forest ecosystem functions under a changing climate. Long-term biomass changes are the  
19 result of accumulated short-term changes, which can be affected by endogenous  
20 processes such as gap filling in small-scale canopy openings. Here, we used 26 years  
21 (1993–2019) of repeated tree census data in an old-growth, cool-temperate, deciduous  
22 mixed forest that contains three topographic units (riparian, denuded slope, and terrace)  
23 in northern Japan to document decadal changes in aboveground biomass (AGB) and their  
24 processes in relation to endogenous processes and climatic factors. AGB increased  
25 steadily over the 26 years in all topographic units, but different tree species contributed  
26 to the increase among the topographic units. AGB gain within each topographic unit  
27 exceeded AGB loss via tree mortality in most of the measurement periods despite  
28 substantial temporal variation in AGB loss. At the local scale, variations in AGB gain  
29 were partially explained by compensating growth of trees around canopy gaps. Climate  
30 affected the local-scale AGB gain: the gain was larger in the measurement periods with  
31 higher mean temperature during the current summer but smaller in those with higher  
32 mean temperature during the previous autumn, synchronously in all topographic units.  
33 The decadal climate trends of warming are likely to have contributed to the steady  
34 increase in AGB in this old-growth forest.

35 Key words: forest biomass • long-term data • Kanumazawa Riparian Research Forest •  
36 temperature

37

## 38 **Introduction**

39 Old-growth forests are widely recognized to play an important role in the carbon cycle  
40 (Luyssaert et al. 2008). It has been commonly accepted that old-growth forests are carbon  
41 neutral (Odum 1969) and their aboveground biomass (AGB) is at ‘steady state’, with equal  
42 gross primary production and respiration (Bormann and Likens 1979). However, recent  
43 studies indicate that they grow continuously (Foster et al. 2014) and work as carbon sinks  
44 with increasing biomass over centuries (Luyssaert et al. 2008). As biomass growth of old-  
45 growth forests is more susceptible to climate change than that in young forests (Chen et al.  
46 2016), assessing long-term changes in biomass of old-growth forests is critical in evaluating  
47 the effects of climate change on forest ecosystem functions (McDowell et al. 2020).

48 Long-term changes in biomass result from the accumulation of short-term changes in the  
49 form of gain due to tree growth and loss due to mortality (Hoshizaki et al. 2004). Therefore,  
50 to understand how climate affects changes in AGB, the effects of climatic factors on each  
51 component need to be taken into account (Chen and Luo 2015; Peña et al. 2018). In addition,  
52 endogenous processes such as gap filling in small-scale canopy openings can drive biomass  
53 change (Phillips et al. 2009; McDowell et al. 2020): at the local scale, gap formation may  
54 cause first a decrease and then an increase in AGB caused by growth promotion of trees  
55 around the gap. Repeatedly measured tree census data with tree location can be useful in  
56 revealing these processes.

57 Environmental factors such as topographic position affect both forest biomass (Kubota et  
58 al. 2004; Valencia et al. 2009) and tree species composition (Chen and Luo 2015;  
59 Kuuluvainen et al. 2017; Ohmann and Spies 1998). For instance, on northern Honshu, Japan,  
60 *Fagus crenata* often dominates forest stands on hillslopes, whereas more tree species occur in  
61 riparian areas (Suzuki et al. 2002). Tree species in riparian forests have diverse life history  
62 traits (e.g., both shorter and longer lifespans, heavy sprouting; Nakamura and Inahara 2007;  
63 Sakio 2020). Therefore, hillslope and riparian stands are expected to differ in the dynamics  
64 (i.e., growth and mortality) and, consequently, the pattern of biomass changes in component  
65 species. In addition, a recent analysis of long-term tree census data in northern Japan has  
66 revealed different responses among species to changing climate and consequent changes in

67 stand structure and species composition (Hiura et al. 2019). Thus, stands with different  
68 topographic characteristics can show different responses to climate change.

69 Here, we quantify decadal changes in AGB and their processes in relation to endogenous  
70 processes and climatic factors, using tree census data measured repeatedly over 26 years  
71 (1993–2019) in an old-growth, cool-temperate deciduous mixed forest with different types of  
72 topographic units in northern Japan. We ask the following questions: (1) Did AGB show net  
73 increase or decrease over the whole forest and study period? (2) Did tree species contribute  
74 differently to biomass change among the different types of topographic units? (3) How did  
75 gain and loss contribute to the overall changes in stand biomass? (4) Did climatic factors and  
76 endogenous processes such as canopy gap formation and recovery influence short-term  
77 changes in AGB at the local scale?

## 78 **Materials and methods**

### 79 **Study site**

80 The study was conducted in the Kanumazawa Riparian Research Forest (KRRF) in Iwate,  
81 northern Japan (39°06'N, 140°51'E), an old-growth forest with no record of significant  
82 anthropogenic disturbances. In KRRF, tree community dynamics have been repeatedly  
83 measured since the establishment of a 4.71-ha permanent plot in 1993 (Fig. 1; Suzuki et al.  
84 2002). This site is one of the core research sites of the Japan Long-Term Ecological Research  
85 Network (JaLTER). KRRF has a cool-temperate climate with a mean annual temperature of  
86 8.8 °C and a warmth index (Kira 1991) of 71 °C month (Noguchi et al. unpublished). The  
87 mean annual precipitation is 2000 mm, and snow cover lasts 5 months with maximum snow  
88 depth of approximately 2 m (Oki et al. 2013). The vegetation depends on the topographic unit.  
89 The riparian area is covered with a species-rich deciduous broadleaved forest consisting of  
90 both riparian specialists (*Cercidiphyllum japonicum*, *Aesculus turbinata*, *Acer mono*,  
91 *Pterocarya rhoifolia*, and *Ulmus laciniata*) and habitat generalists (*Fagus crenata* and  
92 *Quercus crispula*) (Masaki et al. 2008; Suzuki et al. 2002). The upper slopes and terrace are  
93 dominated by *F. crenata* and *Q. crispula*. Detailed information on the ecology of component  
94 species is available in Hoshizaki et al. (1997, 1999), Masaki et al. (2005), and Osumi (2006).  
95 The age of the largest *C. japonicum* individual is estimated to be more than 500 years (Osumi  
96 2006), indicating that this forest is sufficiently old-growth. The natural disturbance regime in  
97 KRRF is characterized by canopy gap formation and fluvial sediment movements (Oki et al.  
98 2013). Gap-creating disturbance occurs about every 1 to 3 years, with gap size ranging from

99 tens to hundreds of square meters (Oki et al. 2013). Recent fluvial sediment movements were  
100 recorded in 1988, 1998, and 2007, causing ground disturbance with sizes ranging from 144  
101 m<sup>2</sup> to 680 m<sup>2</sup> but no damage to canopy trees.

## 102 **Field measurement**

103 The 4.71-ha permanent plot was divided to 471 10-m × 10-m quadrats (Fig. 1). The plot  
104 ranges in elevation from 400 to 460 m a.s.l., and includes three topographic units: riparian  
105 (3.11 ha), terrace (1.06 ha), and denuded slope between them (0.57 ha). In the whole plot, all  
106 stems greater than 5 cm in diameter at breast height (DBH) were tagged for identification and  
107 mapped, and DBH was measured at the same marked location on each stem every 2 years  
108 from 1993 to 1999 and every 4 years from then to 2019.

## 109 **Estimation of AGB change and its components**

110 We calculated tree AGB, basal area (BA), and stem density in each topographic unit.  
111 Individual tree AGB was estimated by using a general allometric equation for tree species in  
112 Japan (Ishihara et al. 2015):

113

$$\ln(y) = -1.196 + 1.162 \times \ln(D) + 0.338 \times (\ln(D))^2 - 0.044 \times (\ln(D))^3 + 0.708 \times \ln(\rho) \quad (1)$$

114

115 where  $y$  is AGB;  $D$  is stem DBH, and  $\rho$  is the wood specific gravity of each species (Editorial  
116 Board of Wood Industry 1966; Kurokawa et al. unpublished; Fujiwara et al. 2007).

117 Confidence intervals of changes in AGB, BA, and stem density were estimated via  
118 bootstrapping across 10-m × 10-m quadrats following the method of Valencia et al. (2009).

119 To overview trends in AGB change during the study period and net annual change in  
120 AGB, we calculated AGB for three tree size classes: large ( $\geq 50$  cm DBH), medium (15–50  
121 cm DBH), and small (5–15 cm DBH). The net annual change in AGB (in Mg ha<sup>-1</sup> y<sup>-1</sup>) was  
122 calculated each 4-year period from 1996 to 2019 from the tree DBH data of 1995 to 2019. It  
123 was then dissected into annual AGB gain and annual AGB loss. Annual AGB gain was  
124 calculated separately for growth of trees in each size class and ingrowth, and AGB loss was  
125 calculated for mortality of trees in each size class.

## 126 **Analysis of factors affecting short-term AGB gain at local scale**

127 We examined the effects of climatic condition in each measurement period, canopy gap  
128 formation and topography on local-scale AGB gain using two generalized linear mixed-effect

129 models (GLMMs). For both models, variables were calculated for every 20-m × 20-m subplot  
130 in each 4-year period from 1996 to 2019. Subplot size was determined as an appropriate area  
131 to detect gap formation and subsequent recovery in consideration of the range of gap size in  
132 KRRF. Both models used AGB gain as the response variable and included subplot as a  
133 random effect.

134 In model 1, we aimed to investigate whether the amount of AGB gain differed among the  
135 measurement periods with the effects of topographic unit and gap formation in the current and  
136 previous measurement periods. Fixed effects were initial AGB in the current measurement  
137 period, AGB losses in the current and previous measurement periods, topographic unit, and  
138 the five 4-year measurement periods between 2000 and 2019, with topographic unit and  
139 measurement period as categorical variables. Initial AGB was included as it is expected to be  
140 the “capital” for AGB gain by tree growth. AGB losses were indices of gap formation in the  
141 current and previous measurement periods.

142 In model 2, the effect of climate was analyzed separately from the effect of measurement  
143 period to avoid multicollinearity. Fixed effects were initial AGB in the current measurement  
144 period, AGB loss in the current and previous measurement periods, topographic unit, and  
145 mean temperature during the previous autumn (September–November) and the current  
146 summer (June–August) over the measurement periods. Both types of mean temperature have  
147 a major influence on annual DBH growth of individual trees in most dominant species of  
148 KRRF (Matsushita et al. manuscript in preparation). As the on-site temperature data do not  
149 cover the entire study period, we used data from the nearest weather station, at Wakayanagi  
150 (39°08'N, 141°04'E; 97 m a.s.l.: Japan Meteorological Agency, <https://www.data.jma.go.jp/gmd/risk/obsdl/index.php>), 18 km east of the study site. These models were fitted by the lme4  
151 v. 1.1-21 package (Bates et al. 2015) in R 3.6.3 (R Core Team 2020). To evaluate the variance  
152 explained by the models, we calculated two  $R^2$  values for mixed-effect models following the  
153 method of Nakagawa et al. (2017): marginal  $R^2$  ( $R^2_{\text{GLMM}(m)}$ ), which is the proportion of the  
154 variance explained by fixed effects, and conditional  $R^2$  ( $R^2_{\text{GLMM}(c)}$ ), which is the proportion of  
155 the variance explained by both fixed and random effects. These were calculated by the  
156 MuMIn v. 1.43.15 package (Bartoń 2019) in R.

## 158 **Results**

### 159 **Overall changes in AGB at plot scale**

160 BA in 1993 was greatest in the riparian unit (34.2 m<sup>2</sup> ha<sup>-1</sup>) and least in the denuded slope unit

161 (Table 1). From 1993 to 2019, BA increased significantly in all topographic units. AGB was  
162 greatest in the terrace unit (246.0 Mg ha<sup>-1</sup>) at the beginning of the study period (Table 1). It  
163 increased significantly in all topographic units during the study period, increasing in most 4-  
164 year periods except for some short pauses; for instance, from 2011 to 2015 in the riparian and  
165 denuded slope units (Fig. 2). AGB of large trees ( $\geq 50$  cm DBH) in 1993 occupied 76.7% of  
166 total AGB in riparian, 70.6% in denuded slope, and 77.7% in terrace units. Trends of  
167 increasing total AGB in the riparian and terrace units were similar to those of large-tree AGB.  
168 During the study period, stem density declined in the riparian and terrace units but increased  
169 in the denuded slope unit (Table 1). The change in stem density was significant only in the  
170 riparian unit.

171 In the riparian unit, *C. japonicum* had the largest AGB at the beginning of the study  
172 period, followed by *F. crenata*, *A. turbinata*, *Q. crispula*, and *A. mono* (Table 2). AGB of  
173 these species, except for *Q. crispula*, increased during the study period. *Pterocarya rhoifolia*  
174 had the greatest increment in AGB over the study period, accounting for 52.3% of the total  
175 increment in the riparian unit, followed by *A. turbinata* at 25.4%. In contrast, several other  
176 species with relatively small AGB at the beginning, such as *Zelkova serrata* and *Ulmus*  
177 *laciniata*, showed a decline in AGB during the study period. The denuded slope and terrace  
178 units were dominated by *F. crenata* and *Q. crispula*, and the denuded slope by *A. mono* as  
179 well (Table 2). All these species had an increase in AGB during the study period, maintaining  
180 the AGB-based rank of species composition.

181 Annual gain in AGB remained at approximately 3 Mg ha<sup>-1</sup> y<sup>-1</sup> with some differences  
182 among the measurement periods: larger in 2008–2011 and 2016–2019 and smaller in 2004–  
183 2007 in all topographic units (Fig. 3). In the riparian and terrace units, large- and medium-  
184 sized trees accounted for most of the annual gain. Annual losses in AGB fluctuated among the  
185 4-year periods, and were largest in 2012–2015 in all topographic units. Regardless of  
186 topographic unit, measurement periods with greater loss of AGB of large trees tended to have  
187 greater total loss of AGB. As a consequence, net annual change in AGB ranged from -0.6 to  
188 +2.6 Mg ha<sup>-1</sup> y<sup>-1</sup> but stayed positive except in 2012 to 2015 in the riparian and denuded slope  
189 units.

## 190 **Effects of climate and gap formation on short-term AGB gain at local scale**

191 Local-scale AGB gain in the 20-m × 20-m subplots was positively influenced by initial AGB  
192 in each measurement period (GLMM model 1: Table 3, Fig. 4). It was significantly greater in  
193 subplots with larger AGB loss in the previous measurement period but smaller in subplots



194 with larger AGB loss in the current measurement period. It was not significantly affected by  
195 topographic unit. It differed significantly among the measurement periods: smaller in 2004–  
196 2007 and larger in 2008–2011 and 2016–2019. In model 1,  $R^2_{\text{GLMM}(m)} = 0.31$  and  $R^2_{\text{GLMM}(c)} =$   
197 0.76, indicating that 31% of the variation was explained by fixed effects and 76% by fixed  
198 and random effects. In model 2 (Table 4), the effects of initial AGB, AGB loss in the current  
199 and previous measurement periods, and topographic unit were almost identical to those in  
200 model 1. Local-scale AGB gain was larger in measurement periods with higher mean  
201 temperature during the current summer but smaller in those with higher mean temperature  
202 during the previous autumn. Model 2 explained almost identical variation as model 1, with  
203  $R^2_{\text{GLMM}(m)} = 0.32$  and  $R^2_{\text{GLMM}(c)} = 0.77$ .

## 204 Discussion

205 AGB of KRRF increased steadily over the 26 years in all topographic units, with increments  
206 of 30 to 35 Mg ha<sup>-1</sup> in each (Table 1). BA also increased over the study period, even though it  
207 was initially equivalent to values reported in other cool-temperate old-growth forests in Japan  
208 (Masaki et al. 1992; Nakashizuka 1988; Seiwa et al. 2013), indicating that the forest had  
209 already been well stocked. These results are consistent with reports that temperate old-growth  
210 forests continuously gain biomass over the long term (Keeton et al. 2011; Luysaert et al.  
211 2008). This continuous stand-scale biomass increment was attributable mainly to an increase  
212 in AGB of large trees, in agreement with the reported global importance of large trees in  
213 determining stand AGB (Lutz et al. 2018; Slik et al. 2013).

214 Patterns of tree growth or stand-biomass-change vary across tree species composition and  
215 diversity, as well as with environmental conditions such as topography (Kubota et al. 2004;  
216 Valencia et al. 2009). In KRRF, topography was reported to determine tree species  
217 distribution through affecting seedling survival differently across species (Masaki et al. 2005).  
218 Here, however, a steady increase in AGB was common to all three topographic units (Table 1;  
219 Fig. 2), despite the difference in tree species composition among them (Table 2). In addition,  
220 local-scale AGB gain did not differ among the topographic units (Table 3). We attribute this  
221 similarity to the distinct AGB increment in *F. crenata*, which is dominant in all three  
222 topographic units (Table 2). A growing abundance of *F. crenata* is documented in several  
223 stable old-growth forest (Seiwa et al. 2013; Yamamoto and Nishimura 1999). Increases in  
224 both AGB and stem density of *F. crenata* in KRRF may be due to lack of remarkable  
225 disturbance even in the riparian unit during the study period. *Pterocarya rhoifolia*, a riparian  
226 specialist of cool-temperate forests in Japan (Sakio et al. 2002), made the largest contribution

227 to the stand AGB increment in the riparian unit (Table 2). Despite the substantial decline in its  
228 stem density (Appendix 1), its AGB at the end of the study period was 3 times the initial  
229 value. It is likely that the fast growth of *P. rhoifolia* (Sakio 1993) is associated with its rapid  
230 increase in AGB. Although AGB decreased in some species such as *Z. serrata* and *U.*  
231 *laciniata* in the riparian unit, *P. rhoifolia* compensated for the decrease and resulted in the  
232 stand-level AGB increase.

233 Mortality is the major cause of reduced growth or decline in AGB (Schuster et al. 2008;  
234 Xu et al. 2012). Although large disturbances such as strong typhoons, insect outbreaks, or  
235 severe flooding in the riparian unit were not recorded during the 26 years, the loss of AGB  
236 varied substantially among the topographic units and among the 4-year measurement periods  
237 (Fig. 3). These variations were explained mainly by the spatio-temporal variation in mortality  
238 of large trees. A significant contribution of large-tree mortality to the AGB loss has also been  
239 reported in other old-growth forests (Hoshizaki et al. 2004). Despite these temporal and  
240 spatial variations, the AGB loss generally remained smaller than the AGB gain, bringing  
241 about a positive change in AGB in most of the measurement periods. The temporal change of  
242 stand-level AGB appears to be inconsistent with the assumed long-term balance between  
243 biomass loss caused by canopy gap formation and subsequent gain during gap recovery.

244 In contrast to AGB loss, temporal fluctuations in AGB gain were generally synchronized  
245 across the topographic units at the stand scale (Fig. 3). The results of model 1 indicate that  
246 local-scale AGB gain also differed among measurement periods even after adjustment for  
247 initial AGB and disturbance during each period (Table 3). As expected, initial AGB positively  
248 influenced local-scale AGB gain (Fig.4). Larger AGB loss in the previous measurement  
249 period caused greater AGB gain, suggesting that variations in local-scale AGB gain are  
250 partially explained by recovery in and around canopy gaps. Local-scale AGB gain also  
251 substantially differed among the measurement periods. The results of model 2 suggest that the  
252 observed temporal variations in AGB gain are caused by climatic factors: a hotter current  
253 summer had positive effects whereas a warmer previous autumn had negative effects on AGB  
254 gain (Table 4). The positive response to high temperature in the growing season is consistent  
255 with the trends of individual-tree growth observed in deciduous broadleaved species in KRRF  
256 (Matsushita et al. manuscript in preparation) and other cool-temperate forests in Japan (Hiura  
257 et al. 2019). The negative effect of a warmer autumn on growth is also found in individual-  
258 tree growth in KRRF (Matsushita et al. manuscript in preparation) and may be caused by a  
259 larger increment in respiration than in photosynthesis (Piao et al. 2008).

260 Our models explained a considerable amount of variation in local AGB gain, although the



261 analysis did not include other potential factors that enhance tree growth such as change in  
262 precipitation (Hiura et al. 2019), rising CO<sub>2</sub> levels in the atmosphere (e.g., Norby et al. 2005),  
263 and nitrogen deposition (Thomas et al. 2010). The temperature at the weather station nearest  
264 to KRRF shows a substantial rise in summer and autumn temperatures over the past 40 years  
265 (Appendix 2). Decadal climate trends of warming are likely to have contributed to the  
266 observed steady increase in AGB in KRRF by providing favorable conditions for tree growth  
267 in the study period. Warming-induced growth acceleration in the past several decades has  
268 been reported in temperate and boreal forests in Europe (Kauppi et al. 2014; Pretzsch et al.  
269 2014). In Japan, some cool-temperate beech-dominated forests are predicted to be vulnerable  
270 to warming (Matsui et al. 2009). Accumulation of tree growth data from a broader range of  
271 temperatures across cool-temperate forests in Japan will improve our understanding of the  
272 influence of climate change on this type of forest.

## 273 **Acknowledgements**

274 We thank many colleagues, including Gaku Hitsuma, Chinatsu Homma, Shoji Naoe, Takayuki Ota  
275 and Takanobu Yagi for field assistance. We also thank Haruko Narita and Saori Sato for data  
276 preparation. Part of the data of this study was obtained from the Monitoring Sites 1000 Project of the  
277 Ministry of the Environment, Japan. This study was partly supported by JSPS KAKENHI Grant  
278 Numbers 15H04517, 19H02999 and 21H04946. We have no conflict of interest to declare.

## 279 **References**

- 280 Bartoń K (2019) Package ‘MuMIn’. Multi-Model Inference.
- 281 Bates D, Mächler M, Bolker B, Walker S (2015) Fitting linear mixed-effects models using lme4. 2015  
282 67:48. <https://doi.org/10.18637/jss.v067.i01>
- 283 Bormann FH, Likens GE (1979) Pattern and process in a forested ecosystem : disturbance, development,  
284 and the steady state based on the Hubbard Brook ecosystem study. Springer-Verlag, New York,  
285 USA
- 286 Chen HYH, Luo Y (2015) Net aboveground biomass declines of four major forest types with forest ageing  
287 and climate change in western Canada’s boreal forests. *Global Change Biol* 21:3675–3684.  
288 <https://doi.org/10.1111/gcb.12994>
- 289 Chen HYH, Luo Y, Reich PB, Searle EB, Biswas SR (2016) Climate change-associated trends in net  
290 biomass change are age dependent in western boreal forests of Canada. *Ecol Lett* 19:1150–1158.  
291 <https://doi.org/10.1111/ele.12653>
- 292 Editorial Board of Wood Industry (1966) Wood Materials of Japan. Wood Technological Association of  
293 Japan, Tokyo (in Japanese)

- 294 Foster JR, D'Amato AW, Bradford JB (2014) Looking for age-related growth decline in natural forests:  
295 unexpected biomass patterns from tree rings and simulated mortality. *Oecologia* 175:363–374.  
296 <https://doi.org/10.1007/s00442-014-2881-2>
- 297 Fujiwara T, Yamashita K, Kuroda K (2007) Basic densities as a parameter for estimating the amount of  
298 carbon removal by forests and their variation. *Bulletine of FFPRI* 6: 215–226.
- 299 Hiura T, Go S, Iijima H (2019) Long-term forest dynamics in response to climate change in northern mixed  
300 forests in Japan: A 38-year individual-based approach. *For Ecol Manage* 449: 117469.  
301 <https://doi.org/10.1016/j.foreco.2019.117469>
- 302 Hoshizaki K, Suzuki W, Sasaki S (1997) Impacts of secondary seed dispersal and herbivory on seedling  
303 survival in *Aesculus turbinata*. *J Veg Sci* 8:735–742
- 304 Hoshizaki K, Suzuki W, Nakashizuka T (1999) Evaluation of secondary dispersal in a large-seeded tree  
305 *Aesculus turbinata*: a test of directed dispersal. *Plant Ecol* 144:167–176.  
306 <https://doi.org/10.1023/a:1009816111057>
- 307 Hoshizaki K, Niiyama K, Kimura K, Yamashita T, Bekku Y, Okuda T, Quah ES, Noor NSM (2004)  
308 Temporal and spatial variation of forest biomass in relation to stand dynamics in a mature,  
309 lowland tropical rainforest, Malaysia. *Ecol Res* 19: 357–363. [https://doi.org/10.1111/j.1440-](https://doi.org/10.1111/j.1440-1703.2004.00645.x)  
310 [1703.2004.00645.x](https://doi.org/10.1111/j.1440-1703.2004.00645.x)
- 311 Ishihara MI, Utsugi H, Tanouchi H, Aiba M, Kurokawa H, Onoda Y, Nagano M, Umehara T, Ando M,  
312 Miyata R, Hiura T (2015) Efficacy of generic allometric equations for estimating biomass: a test  
313 in Japanese natural forests. *Ecol Appl* 25:1433–1446. <https://doi.org/10.1890/14-0175.1>
- 314 Kauppi PE, Posch M, Pirinen P (2014) Large Impacts of Climatic Warming on Growth of Boreal Forests  
315 since 1960. *PLOS ONE* 9:e111340. <https://doi.org/10.1371/journal.pone.0111340>
- 316 Keeton WS, Whitman AA, McGee GC, Goodale CL (2011) Late-Successional Biomass Development in  
317 Northern Hardwood-Conifer Forests of the Northeastern United States. *For Sci* 57:489–505.  
318 <https://doi.org/10.1093/forestscience/57.6.489>
- 319 Kira T (1991) Forest ecosystems of east and southeast Asia in a global perspective. *Ecol Res* 6:185–200.  
320 <https://doi.org/10.1007/BF02347161>
- 321 Kubota Y, Murata H, Kikuzawa K (2004) Effects of topographic heterogeneity on tree species richness and  
322 stand dynamics in a subtropical forest in Okinawa Island, southern Japan. *J Ecol* 92:230–240.
- 323 Kuuluvainen T, Hofgaard A, Aakala T, Gunnar Jonsson B (2017) North Fennoscandian mountain forests:  
324 History, composition, disturbance dynamics and the unpredictable future. *For Ecol Manage*  
325 385:140–149. <http://dx.doi.org/10.1016/j.foreco.2016.11.031>
- 326 Lutz JA, Furniss TJ, Johnson DJ et al. (2018) Global importance of large-diameter trees. *Global Ecol*  
327 *Biogeogr* 27:849–864. <https://doi.org/10.1111/geb.12747>
- 328 Luyssaert S, Schulze ED, Börner A, Knohl A, Hessenmöller D, Law BE, Ciais P, Grace J (2008) Old-  
329 growth forests as global carbon sinks. *Nature* 455:213–215.
- 330 Masaki T, Suzuki W, Niiyama K, Iida S, Tanaka H, Nakashizuka T (1992) Community structure of a  
331 species-rich temperate forest, Ogawa Forest Reserve, central Japan. *Plant Ecol* 98:97–111.  
332 <https://doi.org/10.1007/bf00045549>

- 333 Masaki T, Osumi K, Takahashi K, Hozshizaki K (2005) Seedling dynamics of *Acer mono* and *Fagus*  
334 *crenata*: an environmental filter limiting their adult distributions. *Plant Ecol* 177:189–199.  
335 <https://doi.org/10.1007/s11258-005-2177-z>
- 336 Masaki T, Osumi K, Hoshizaki K, Hosino D, Takahashi K, Matsune K, Suzuki W (2008) Diversity of tree  
337 species in mountain riparian forest in relation to disturbance-mediated microtopography. In:  
338 Sakio H, Tamura T (eds) *Ecology of Riparian Forests in Japan: Disturbance, Life History, and*  
339 *Regeneration*. Springer Japan, Tokyo, pp 251–266
- 340 Matsui T, Takahashi K, Tanaka N, Hijioka Y, Horikawa M, Yagihashi T, Harasawa H (2009) Evaluation of  
341 habitat sustainability and vulnerability for beech (*Fagus crenata*) forests under 110 hypothetical  
342 climatic change scenarios in japan. *Appl Veg Sci* 12:328–339. [https://doi.org/10.1111/j.1654-](https://doi.org/10.1111/j.1654-109X.2009.01027.x)  
343 [109X.2009.01027.x](https://doi.org/10.1111/j.1654-109X.2009.01027.x)
- 344 McDowell NG, Allen CD, Anderson-Teixeira K et al. (2020) Pervasive shifts in forest dynamics in a  
345 changing world. *Science* 368:eaa9463. <https://doi.org/10.1126/science.aaz9463>
- 346 Nakagawa S, Johnson PCD, Schielzeth H (2017) The coefficient of determination  $R^2$  and intra-class  
347 correlation coefficient from generalized linear mixed-effects models revisited and expanded. *J R*  
348 *Soc Interface* 14:20170213. <https://doi.org/10.1098/rsif.2017.0213>
- 349 Nakamura F, Inahara S (2007) Fluvial Geomorphic Disturbances and Life History Traits of Riparian Tree  
350 Species. In: Johnson EA, Miyanishi K (eds) *Plant Disturbance Ecology*. Academic Press,  
351 Burlington, pp 283–310. <https://doi.org/10.1016/b978-012088778-1/50011-x>
- 352 Nakashizuka T (1988) Regeneration of beech (*Fagus crenata*) after the simultaneous death of  
353 undergrowing dwarf bamboo (*Sasa kurilensis*). *Ecol Res* 3:21–35.  
354 <https://doi.org/10.1007/bf02348692>
- 355 Norby RJ, Delucia EH, Gielen B et al. (2005) Forest response to elevated CO<sub>2</sub> is conserved across a broad  
356 range of productivity. *Proc Natl Acad Sci U S A* 102:18052–18056.  
357 <https://doi.org/10.1073/pnas.0509478102>
- 358 Odum EP (1969) The strategy of ecosystem development. *Science* 164:262–270.  
359 <https://doi.org/10.1126/science.164.3877.262>
- 360 Ohmann JL, Spies TA (1998) Regional gradient analysis and spatial pattern of woody plant communities of  
361 Oregon forests. *Ecol Monogr* 68:151–182. [https://doi.org/10.1890/0012-](https://doi.org/10.1890/0012-9615(1998)068[0151:Rgaasp]2.0.Co;2)  
362 [9615\(1998\)068\[0151:Rgaasp\]2.0.Co;2](https://doi.org/10.1890/0012-9615(1998)068[0151:Rgaasp]2.0.Co;2)
- 363 Oki S, Akiyoshi T, Hoshino D, Shibata M, Matsushita M, Hoshizaki K (2013) Interactive effect of canopy  
364 and fluvial disturbances on sapling community structure and species diversity in a montane  
365 riparian forest. *Ecoscience* 20:194–203. <https://doi.org/10.2980/20-2-3609>
- 366 Osumi K (2006) Life history of *Cercidiphyllum japonicum*: the paradox of early-seral species as a  
367 component of climax forest. In: Masaki T, Tanaka H, Shibata M (eds) *Forest ecology, with long-*  
368 *term perspectives*. Bun-ichi Sogo Shuppan, Tokyo (in Japanese)
- 369 Peña MA, Feeley KJ, Duque A (2018) Effects of endogenous and exogenous processes on aboveground  
370 biomass stocks and dynamics in Andean forests. *Plant Ecol* 219:1481–1492.  
371 <https://doi.org/10.1007/s11258-018-0895-2>

- 372 Phillips OL, Higuchi N, Vieira S, Baker TR, Chao K-J, Lewis SL (2009) Changes in Amazonian Forest  
373 Biomass, Dynamics, and Composition, 1980–2002. *Amazonia and Global Change*  
374 <https://doi.org/10.1029/2008GM000779>, pp 373–387
- 375 Piao S, Ciais P, Friedlingstein P et al. (2008) Net carbon dioxide losses of northern ecosystems in response  
376 to autumn warming. *Nature* 451:49–52. <http://dx.doi.org/10.1038/nature06444>
- 377 Pretzsch H, Biber P, Schütze G, Uhl E, Rötzer T (2014) Forest stand growth dynamics in Central Europe  
378 have accelerated since 1870. *Nature Communications* 5:4967.  
379 <https://doi.org/10.1038/ncomms5967>
- 380 R Core Team (2020) R: A language and environment for statistical computing. R Foundation for Statistical  
381 Computing, Vienna, Austria
- 382 Sakio H (1993) Sapling growth patterns in *Fraxinus platypoda* and *Pterocarya rhoifolia*. *Jap J Ecol*  
383 43:163–167. [https://doi.org/10.18960/seitai.43.3\\_163](https://doi.org/10.18960/seitai.43.3_163) (in Japanese with English summary)
- 384 Sakio H (2020) Long-Term Ecosystem Changes in Riparian Forests. Springer, Singapore.  
385 <https://doi.org/10.1007/978-981-15-3009-8>
- 386 Sakio H, Kubo M, Shimano K, Ohno K (2002) Coexistence of three canopy tree species in a riparian forest  
387 in the Chichibu Mountains, Central Japan. *Folia Geobot* 37:45–61.  
388 <https://doi.org/10.1007/Bf02803190>
- 389 Schuster WSF, Griffin KL, Roth H, Turnbull MH, Whitehead D, Tissue DT (2008) Changes in  
390 composition, structure and aboveground biomass over seventy-six years (1930–2006) in the  
391 Black Rock Forest, Hudson Highlands, southeastern New York State. *Tree Physiology* 28:537–  
392 549. <https://doi.org/10.1093/treephys/28.4.537>
- 393 Seiwa K, Miwa Y, Akasaka S, Kanno H, Tomita M, Saitoh T, Ueno N, Kimura M, Hasegawa Y, Konno M,  
394 Masaka K (2013) Landslide-facilitated species diversity in a beech-dominant forest. *Ecol Res*  
395 28:29–41. <https://doi.org/10.1007/s11284-012-0996-7>
- 396 Slik JWF, Paoli G, McGuire K et al. (2013) Large trees drive forest aboveground biomass variation in  
397 moist lowland forests across the tropics. *Global Ecol Biogeogr* 22:1261–1271.  
398 <https://doi.org/10.1111/geb.12092>
- 399 Suzuki W, Osumi K, Masaki T, Takahashi K, Daimaru H, Hoshizaki K (2002) Disturbance regimes and  
400 community structures of a riparian and an adjacent terrace stand in the Kanumazawa Riparian  
401 Research Forest, northern Japan. *For Ecol Manage* 157:285–301. [https://doi.org/10.1016/s0378-1127\(00\)00667-8](https://doi.org/10.1016/s0378-1127(00)00667-8)
- 402
- 403 Thomas RQ, Canham CD, Weathers KC, Goodale CL (2010) Increased tree carbon storage in response to  
404 nitrogen deposition in the US. *Nature Geoscience* 3:13–17. <https://doi.org/10.1038/ngeo721>
- 405 Valencia R, Condit R, Muller-Landau HC, Hernandez C, Navarrete H (2009) Dissecting biomass dynamics  
406 in a large Amazonian forest plot. *J Trop Ecol* 25:473–482.  
407 <https://doi.org/10.1017/S0266467409990095>
- 408 Xu C-Y, Turnbull MH, Tissue DT, Lewis JD, Carson R, Schuster WSF, Whitehead D, Walcroft AS, Li J,  
409 Griffin KL (2012) Age-related decline of stand biomass accumulation is primarily due to  
410 mortality and not to reduction in NPP associated with individual tree physiology, tree growth or

411 stand structure in a *Quercus*-dominated forest. J Ecol 100:428–440.  
412 <https://doi.org/10.1111/j.1365-2745.2011.01933.x>  
413 Yamamoto S, Nishimura N (1999) Canopy gap formation and replacement pattern of major tree species  
414 among developmental stages of beech (*Fagus crenata*) stands, Japan. Plant Ecol 140:167-176.  
415 <https://doi.org/10.1023/A:1009713002039>

416 **Tables**

417 Table 1. Basal area, aboveground biomass, and stem density at the study site at the beginning (1993) and end (2019) of the study period with overall changes in three  
 418 topographic units (riparian, denuded slope, and terrace).

|                                               | 1993                | 2019                | Change            |
|-----------------------------------------------|---------------------|---------------------|-------------------|
| Basal area (m <sup>2</sup> ha <sup>-1</sup> ) |                     |                     |                   |
| Riparian                                      | 34.2 (28.7–40.5)    | 38.6 (32.4–457.7)   | 4.5 (2.4–6.5)     |
| Denuded slope                                 | 21.5 (15.3–28.3)    | 26.6 (20.2–33.8)    | 5.1 (2.2–7.8)     |
| Terrace                                       | 32.3 (26.6–37.7)    | 32.3 (26.6–37.7)    | 4.3 (1.5–6.7)     |
| Aboveground biomass (Mg ha <sup>-1</sup> )    |                     |                     |                   |
| Riparian                                      | 244.1 (202.7–289.4) | 274.2 (230.1–326.2) | 30.1 (14.0–45.6)  |
| Denuded slope                                 | 156.8 (100.3–216.0) | 191.5 (136.1–252.7) | 34.7 (13.2–56.1)  |
| Terrace                                       | 246.0 (202.4–293.5) | 276.7 (225.8–336.4) | 30.6 (8.0–53.4)   |
| Stem density (stems ha <sup>-1</sup> )        |                     |                     |                   |
| Riparian                                      | 583 (519–648)       | 509 (452–581)       | -73 (-111 to -36) |
| Denuded slope                                 | 781 (637–939)       | 877 (704–1046)      | 96 (-35 to 235)   |
| Terrace                                       | 952 (833–1061)      | 906 (785–1031)      | -47 (-118 to 24)  |

419 Values in parentheses are 95% confidence intervals. When CIs do not include 0, the changes are significant.



420 Table 2. Overall changes in aboveground biomass (AGB, in Mg ha<sup>-1</sup>) of component tree species in each topographic unit during the study period and the relative  
 421 contribution of each species to the total change in AGB. Species are listed in the order of AGB in 1993 in the entire plot.

| Species                         | Riparian |       |        |                  | Denuded slope |       |        |                  | Terrace |       |        |                  |
|---------------------------------|----------|-------|--------|------------------|---------------|-------|--------|------------------|---------|-------|--------|------------------|
|                                 | 1993     | 2019  | Change | Contribution (%) | 1993          | 2019  | Change | Contribution (%) | 1993    | 2019  | Change | Contribution (%) |
| <i>Fagus crenata</i>            | 52.1     | 56.2  | 4.1    | 13.7             | 68.9          | 80.4  | 11.5   | 33.2             | 139.3   | 153.9 | 14.7   | 47.9             |
| <i>Quercus crispula</i>         | 30.6     | 30.3  | -0.2   | -0.8             | 30.4          | 37.8  | 7.4    | 21.2             | 82.1    | 86.3  | 4.2    | 13.7             |
| <i>Cercidiphyllum japonicum</i> | 58.9     | 61.9  | 3.0    | 10.1             | 0.0           | 0.0   | 0.0    | 0.0              | 0.0     | 0.0   | 0.0    | 0.0              |
| <i>Aesculus turbinata</i>       | 47.8     | 55.5  | 7.6    | 25.4             | 3.8           | 5.4   | 1.6    | 4.5              | 0.0     | 0.0   | 0.0    | 0.0              |
| <i>Acer mono</i>                | 21.0     | 21.6  | 0.5    | 1.8              | 28.9          | 38.0  | 9.0    | 26.1             | 0.2     | 0.4   | 0.2    | 0.6              |
| <i>Pterocarya rhoifolia</i>     | 8.6      | 24.4  | 15.8   | 52.4             | 0.9           | 3.7   | 2.8    | 8.0              | 0.0     | 0.0   | 0.0    | 0.0              |
| <i>Zelkova serrata</i>          | 5.7      | 4.7   | -1.0   | -3.2             | 2.0           | 3.6   | 1.5    | 4.4              | 0.0     | 0.0   | 0.0    | 0.0              |
| <i>Ulmus laciniata</i>          | 4.8      | 2.8   | -2.0   | -6.6             | 0.0           | 0.0   | 0.0    | 0.0              | 0.0     | 0.0   | 0.0    | 0.0              |
| <i>Magnolia obovata</i>         | 4.2      | 6.0   | 1.8    | 6.1              | 0.0           | 0.5   | 0.4    | 1.3              | 1.2     | 2.2   | 1.0    | 3.3              |
| <i>Kalopanax pictus</i>         | 4.5      | 5.0   | 0.5    | 1.8              | 0.1           | 0.7   | 0.6    | 1.7              | 0.0     | 0.3   | 0.3    | 0.9              |
| <i>Acer sieboldianum</i>        | 0.4      | 0.1   | -0.3   | -1.1             | 4.5           | 3.5   | -1.0   | -2.9             | 6.0     | 8.0   | 2.0    | 6.5              |
| <i>Acer japonicum</i>           | 0.5      | 0.9   | 0.4    | 1.3              | 1.9           | 2.4   | 0.5    | 1.5              | 6.0     | 7.4   | 1.4    | 4.5              |
| Others                          | 5.0      | 4.8   | -0.2   | -0.8             | 15.3          | 15.7  | 0.4    | 1.1              | 11.2    | 18.1  | 6.9    | 22.5             |
| Total                           | 244.1    | 274.2 | 30.1   | 100.0            | 156.8         | 191.5 | 34.7   | 100.0            | 246.0   | 276.7 | 30.6   | 100.0            |

422

423

424 Table 3. Results of the generalized linear mixed-effect model (model 1) testing the effects of initial aboveground biomass (AGB), canopy gap formation, topographic  
 425 unit, and measurement period on the AGB gain in 20-m × 20-m subplots.

|                       |               | Estimate | Standard error | df    | <i>t</i> -value | <i>P</i> -value |
|-----------------------|---------------|----------|----------------|-------|-----------------|-----------------|
| Intercept             |               | 0.259    | 0.033          | 148.7 | 7.868           | <0.001          |
| Initial AGB           |               | 0.021    | 0.003          | 135.8 | 8.255           | <0.001          |
| AGB loss by mortality | Previous      | 0.016    | 0.006          | 511.7 | 2.819           | 0.005           |
|                       | Current       | -0.017   | 0.006          | 481.0 | -2.782          | 0.006           |
| Topographic unit      | Denuded slope | 0.023    | 0.047          | 109.3 | 0.501           | 0.618           |
| (v. Riparian)         | Terrace       | -0.018   | 0.039          | 109.0 | -0.461          | 0.646           |
| Measurement period    | 2004–2007     | -0.050   | 0.015          | 442.1 | -3.301          | 0.001           |
| (v. 2000–2003)        | 2008–2011     | 0.038    | 0.015          | 445.1 | 2.514           | 0.012           |
|                       | 2012–2015     | -0.005   | 0.015          | 450.5 | -0.327          | 0.743           |
|                       | 2016–2019     | 0.040    | 0.015          | 455.9 | 2.606           | 0.009           |

426

427

428 Table 4. Results of the generalized linear mixed-effect model (model 2) testing the effects of initial aboveground biomass (AGB), canopy gap formation, topographic  
 429 unit, and climate (mean air temperature) of each measurement period on the AGB gain in 20-m × 20-m subplots.

|                                   |                 | Estimate | Standard error | df    | <i>t</i> -value | <i>P</i> -value |
|-----------------------------------|-----------------|----------|----------------|-------|-----------------|-----------------|
| Intercept                         |                 | -0.559   | 0.321          | 445.1 | -1.738          | 0.083           |
| Initial AGB                       |                 | 0.021    | 0.003          | 137.9 | 8.294           | <0.001          |
| AGB loss by mortality             | Previous        | 0.016    | 0.006          | 508.0 | 2.925           | 0.004           |
|                                   | Current         | -0.015   | 0.006          | 481.7 | -2.550          | 0.011           |
| Topographic unit<br>(v. Riparian) | Denuded slope   | 0.023    | 0.047          | 109.4 | 0.498           | 0.619           |
|                                   | Terrace         | -0.018   | 0.038          | 109.1 | -0.462          | 0.645           |
| Mean air temperature              | Previous autumn | -0.137   | 0.023          | 443.0 | -5.865          | <0.001          |
|                                   | Current summer  | 0.120    | 0.021          | 450.8 | 5.803           | <0.001          |

430

## 431 **Figure legends**

432 Fig. 1. Topographic map of the Kanumazawa Riparian Research Forest (KRRF). The solid frame  
433 represents the 4.71-ha KRRF plot. Colors denote the three topographic units: blue, riparian (3.11 ha);  
434 orange, denuded slope (0.57 ha); green, terrace (1.06 ha). Black dotted lines show the 10-m × 10-m  
435 quadrats; thin red lines show the 20-m × 20-m subplots. Contour interval is 2 m.

436 Fig. 2. Trends in total aboveground biomass (AGB) over 26 years in the three topographic units. AGB is  
437 shown for stand total and stems in three size classes: large (diameter at breast height [DBH] ≥ 50 cm),  
438 medium (DBH, 15–50 cm), and small (DBH, 5–15 cm).

439 Fig. 3. Components of average annual change in aboveground biomass (AGB) by each measurement period  
440 in the three topographic units. Blue bars (4 levels of color gradient) denote annual AGB gain from growth  
441 of surviving stems in the three size classes (large, diameter at breast height [DBH] ≥ 50 cm; medium, 15–  
442 50 cm DBH; small, 5–15 cm DBH) and ingrowth. Orange bars (3 levels of color gradient) denote annual  
443 AGB loss from stems that died during each measurement period in the three size classes. Dark gray bars  
444 denote net average annual change in AGB.

445 Fig. 4. Local-scale aboveground biomass (AGB) gain per 4-year measurement period in relation to initial  
446 AGB of measurement period. Colors represent classes of AGB loss in previous measurement period;  
447 symbols represent measurement periods.

Fig. 1

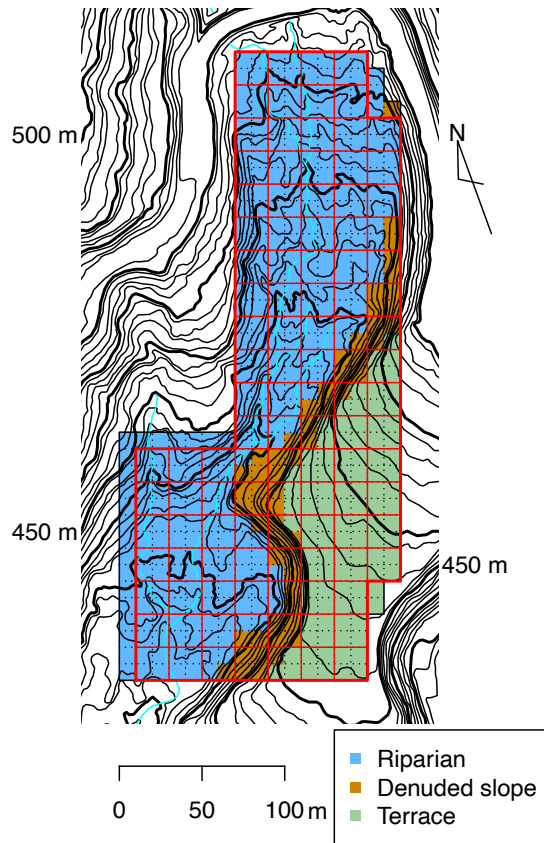

Fig. 2

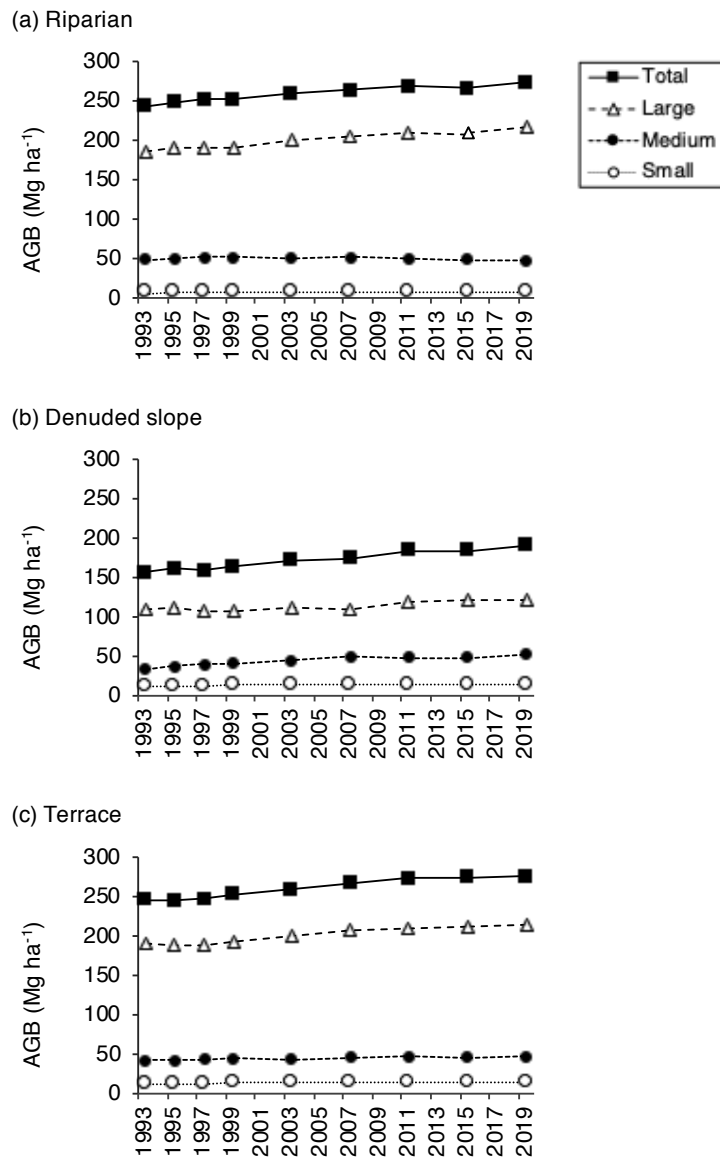



Fig. 3

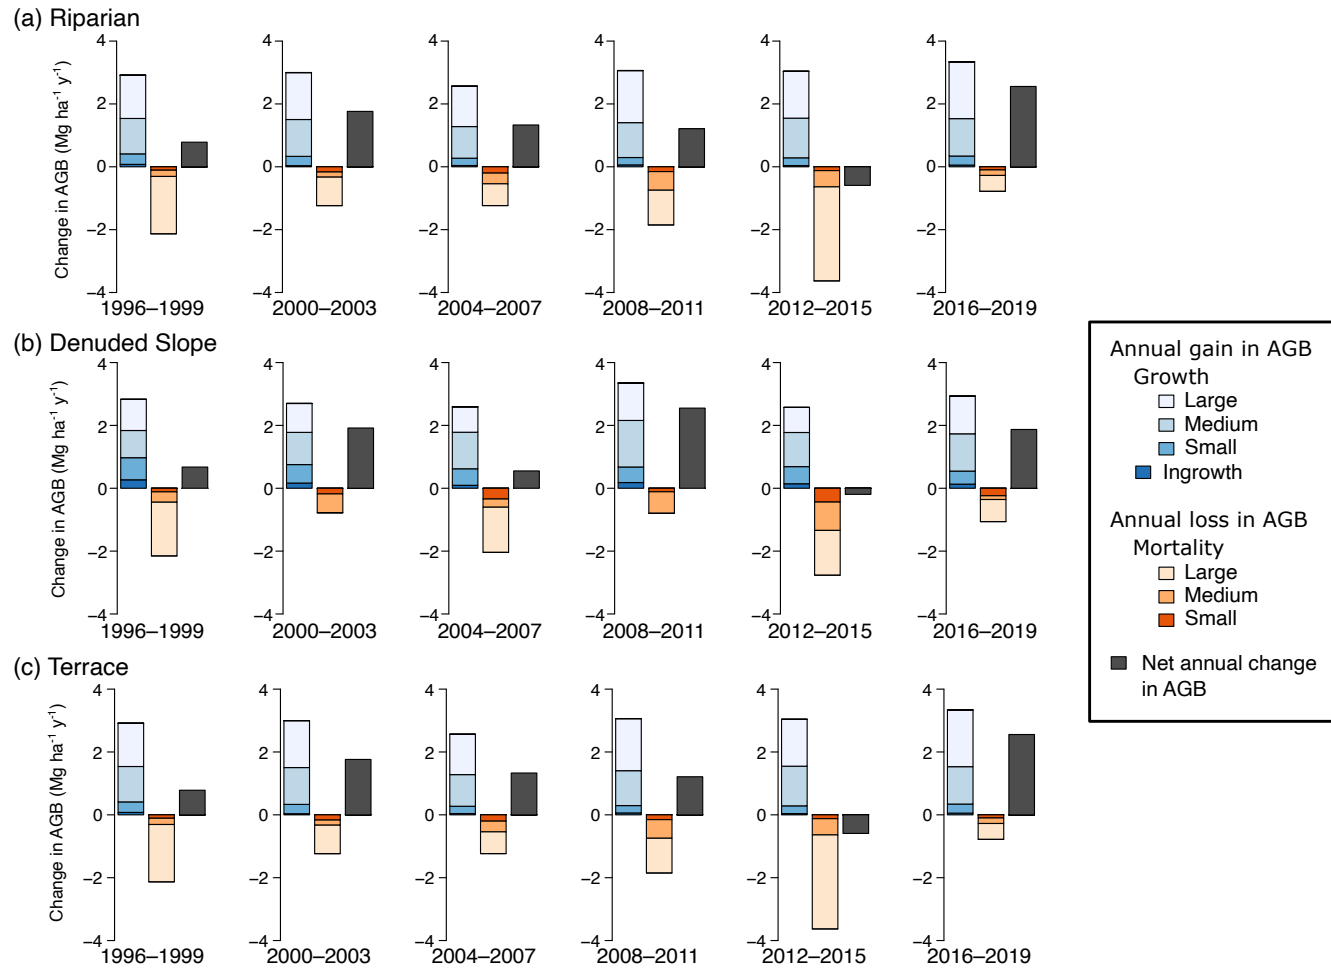

Fig.4

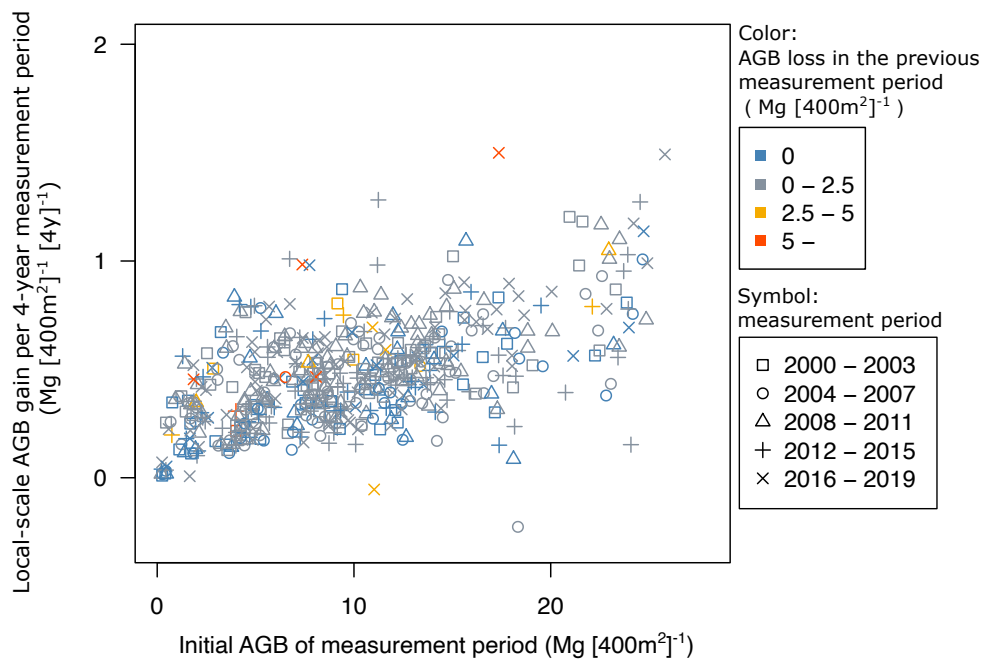

Source: https://www.biorxiv.org/content/biorxiv/early/2021/07/02/2021.07.02.450668.full.pdf
